# Supplementary material
Source: publisher figshare collection journal article supplement (https://future-science-group.figshare.com/ndownloader/files/28456035)
Supplement: Supplementary file 1 [file 28456035]

## Sheet: Sheet1
The correlation scores of 72 substructures.
Substructure	Correlation score
SUB48	5.40196
SUB351	5.22523
SUB299	5.08772
SUB47	4.52482
SUB814	4.22917
SUB751	4.22917
SUB402	4.05376
SUB456	4.05376
SUB455	3.17808
SUB559	3.12745
SUB424	3.0471
SUB841	3.00253
SUB840	2.97436
SUB862	2.9
SUB706	2.68237
SUB396	2.62147
SUB243	2.60479
SUB302	2.59179
SUB250	2.56637
SUB515	2.47287
SUB781	2.44211
SUB228	2.43697
SUB611	2.41667
SUB534	2.38951
SUB701	2.37705
SUB861	2.33166
SUB738	2.31537
SUB662	2.23984
SUB564	2.23984
SUB145	2.18703
SUB718	2.17228
SUB801	2.13302
SUB348	2.09009
SUB606	2.01389
SUB599	1.94958
SUB288	1.94142
SUB502	1.92531
SUB368	1.90404
SUB363	1.90164
SUB39	1.89881
SUB384	1.84509
SUB532	1.82008
SUB804	1.7737
SUB576	1.77222
SUB735	1.76703
SUB501	1.72848
SUB504	1.6885
SUB516	1.68783
SUB695	1.66393
SUB252	1.63988
SUB35	1.63288
SUB533	1.59547
SUB301	1.52632
SUB466	1.51634
SUB659	1.50472
SUB591	1.49932
SUB251	1.49911
SUB757	1.47744
SUB460	1.45729
SUB459	1.45
SUB25	1.42377
SUB306	1.41282
SUB14	1.38696
SUB714	1.37116
SUB415	1.34884
SUB458	1.34884
SUB780	1.25481
SUB189	1.15364
SUB674	1.14978
SUB825	1.09325
SUB687	1.08299
SUB350	0.994513
